# Supplementary material for: Evaluation of the Carbohydrate Composition of Crabapple Fruit Tissues Native to Northern Asia
Source: MDPI journal article supplement (doi:10.3390/plants12193472), 2023-10-04
Supplement: s1 [file s1]

## Supplementary

**Table S1.** Eigenvalues for principal components obtained from PCA and significant characters within each component in the studied *Malus* species (*M. baccata*, *M. chamardabanica*, *M. mandshurica*, *M. sachalinensis*).

| Parameter            | PC 1           | PC 2          |
|----------------------|----------------|---------------|
| Weight               | 0.0031846      | −0.019089     |
| Ascorbic acid        | 0.0048165      | −0.0030743    |
| Water-soluble pectin | −0.048718      | −0.1214       |
| Protopectin          | −0.043461      | −0.13232      |
| Fructose             | 0.061197       | 0.002604      |
| Sorbitol             | 0.39019        | <b>0.8845</b> |
| Glucose              | 0.0027656      | 0.14067       |
| Galactose            | 0.0092162      | 0.11118       |
| Sucrose              | <b>0.91631</b> | −0.39101      |

**Table S2.** Meteorological data for the entire research period, from 2015 to 2020 years.

| 2015                        |         |         |                               |         |         |                    |
|-----------------------------|---------|---------|-------------------------------|---------|---------|--------------------|
| Daytime temperature, °C     |         |         | Nighttime temperature, °C     |         |         |                    |
| Average value               | Minimum | Maximum | Average value                 | Minimum | Maximum | Precipitations, mm |
| 21.8                        | 15.0    | 29.1    | 17.3                          | 12.4    | 24.4    | 79.0               |
| 24.4                        | 19.6    | 29.8    | 18.5                          | 14.6    | 23.3    | 28.0               |
| 21.4                        | 13.8    | 29.3    | 13.7                          | 7.8     | 22.0    | 62.0               |
| 16.8                        | 8.8     | 25.8    | 11.3                          | 4.6     | 17.9    | 88.0               |
| 2016                        |         |         |                               |         |         |                    |
| Daytime temperature, °C     |         |         | Nighttime temperature, °C     |         |         |                    |
| Average value               | Minimum | Maximum | Average value                 | Minimum | Maximum | Precipitations, mm |
| 21.1                        | 7.8     | 31.0    | 14.8                          | 6.8     | 23.2    | 61.0               |
| 24.1                        | 15.3    | 29.9    | 17.4                          | 12.2    | 20.8    | 122.0              |
| 22.9                        | 13.6    | 31.9    | 16.1                          | 7.4     | 20.9    | 167.0              |
| 16.0                        | 11.6    | 21.3    | 12.2                          | 9.3     | 15.8    | 59.0               |
| 2017                        |         |         |                               |         |         |                    |
| Daytime temperature, °C     |         |         | Nighttime temperature, °C     |         |         |                    |
| Average value               | Minimum | Maximum | Average value                 | Minimum | Maximum | Precipitations, mm |
| 17.0                        | 8.2     | 24.4    | 11.7                          | 3.8     | 17.6    | 140                |
| 20.7                        | 12.0    | 30.3    | 14.7                          | 10.0    | 21.4    | 105                |
| 22.2                        | 11.0    | 30.1    | 15.6                          | 7.1     | 21.7    | 68                 |
| 17.8                        | 10.9    | 24.6    | 12.9                          | 8.7     | 16.7    | 38.0               |
| 2018                        |         |         |                               |         |         |                    |
| Daytime temperature, °C, °C |         |         | Nighttime temperature, °C, °C |         |         |                    |
| Average value               | Minimum | Maximum | Average value                 | Minimum | Maximum | Precipitations, mm |
| 20.7                        | 10.9    | 28.7    | 13.6                          | 6.2     | 22.1    | 56                 |
| 23.1                        | 16.7    | 29.3    | 17.6                          | 12.5    | 21.8    | 93                 |
| 24.2                        | 18.0    | 28.9    | 15.2                          | 10.3    | 20.4    | 28                 |
| 21.7                        | 18.1    | 24.8    | 13.5                          | 9.8     | 17.7    | 78                 |
| 2019                        |         |         |                               |         |         |                    |
| Daytime temperature, °C     |         |         | Nighttime temperature, °C     |         |         |                    |
| Average value               | Minimum | Maximum | Average value                 | Minimum | Maximum | Precipitations, mm |
| 16.7                        | 9.6     | 23.6    | 15.5                          | 9.1     | 22.5    | 67                 |
| 19.1                        | 12.9    | 28.2    | 13.6                          | 9.5     | 20.5    | 71                 |
| 19.4                        | 11.7    | 26.8    | 13.4                          | 7.7     | 19.6    | 58                 |
| 21.0                        | 11.6    | 25.6    | 13.4                          | 8.1     | 17.0    | 29                 |
| 2020                        |         |         |                               |         |         |                    |
| Daytime temperature, °C     |         |         | Nighttime temperature, °C     |         |         |                    |
| Average value               | Minimum | Maximum | Average value                 | Minimum | Maximum | Precipitations, mm |
| 22.2                        | 9.8     | 29.8    | 15.5                          | 8.1     | 21.1    | 159                |

|      |      |      |      |     |      |     |
|------|------|------|------|-----|------|-----|
| 21.7 | 15.3 | 28.6 | 15.7 | 9.7 | 20.1 | 175 |
| 20.9 | 13.6 | 28.5 | 14.2 | 9.6 | 19.8 | 34  |
| 17.7 | 12.4 | 23.4 | 13.4 | 9.4 | 21.5 | 66  |

**Table S3.** Ranges of calibration curves.

| Analyte | Concentration, µg/ml |     |
|---------|----------------------|-----|
|         | min                  | max |
| Al      | 0.3                  | 45  |
| Ca      | 0.1                  | 45  |
| Cd      | 0.001                | 45  |
| Cu      | 0.005                | 45  |
| Fe      | 0.05                 | 45  |
| K       | 1                    | 20  |
| Mg      | 0.005                | 45  |
| P       | 0.3                  | 45  |
| Pb      | 0.03                 | 40  |
| S       | 0.5                  | 380 |
| Zn      | 0.001                | 45  |
